# Supplementary material for: Improving the Efficacy of Antimicrobials against Biofilm-Embedded Bacteria Using Bovine Hyaluronidase Azoximer (Longidaza®)
Source: MDPI journal article supplement (doi:10.3390/pharmaceutics13111740), 2021-10-20
Supplement: s1 [file s1]

# Supplementary Materials: Improving the Efficacy of Antimicrobials against Biofilm-Embedded Bacteria using Bovine Hyaluronidase Azoximer (Longidaza®)

Elena Trizna, Diana Baydamshina, Anna Gorshkova, Valentin Drucker, Mikhail Bogachev, Anton Tikhonov and Airat Kayumov

**Table S1.** Minimum Inhibitory Concentration (MIC) and Minimal Bactericidal Concentration (MBC) values of antimicrobials.

|                      | Ciprofloxacin |               | Cefuroxime    |               |
|----------------------|---------------|---------------|---------------|---------------|
|                      | MIC,<br>μg/mL | MBC,<br>μg/mL | MIC,<br>μg/mL | MBC,<br>μg/mL |
| <i>S. aureus</i>     | 0.5           | 32            | 8             | 64            |
| <i>E. faecalis</i>   | 8             | 32            | 8             | 32            |
| <i>E. coli</i>       | 0.5           | 1             | 4             | 8             |
| <i>K. pneumonia</i>  | 0.25          | 16            | 8             | 64            |
| <i>P. aeruginosa</i> | 0.5           | 1             | 8             | 64            |

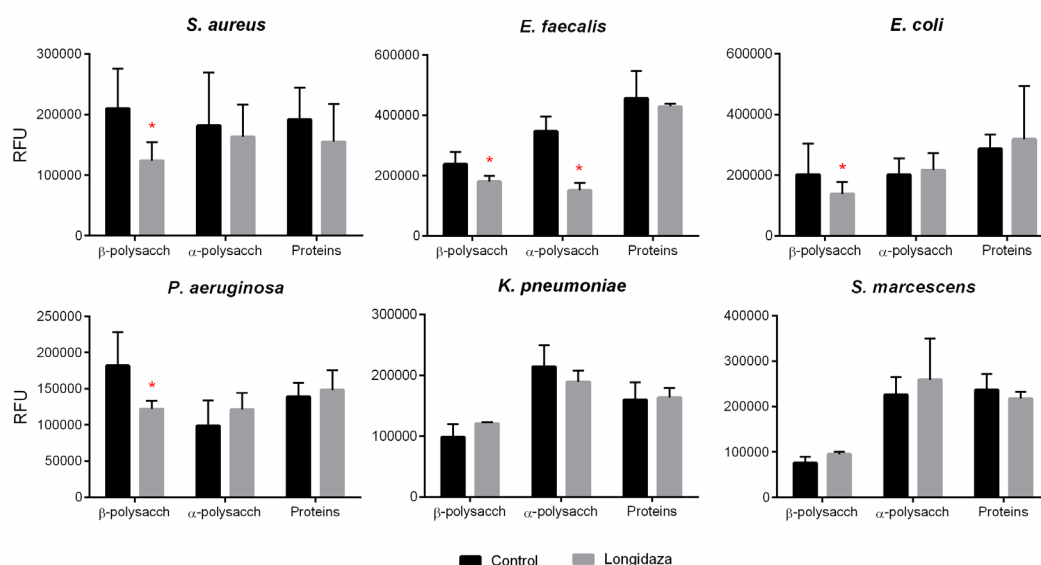

**Figure S1.** Differential evaluation of the fractions of biofilm matrix components of various bacteria before and after 24 h treatment with Longidaza®. Mature 48 h old biofilms were treated with Longidaza® (750 IU/mL) and stained with Concanavalin A, Calcofluor, and SyproOrange to evaluate the changes of α-polysaccharides, β - polysaccharides and proteins composition, respectively. Asterisks (\*) denote statistically significant difference of fluorescence in untreated wells and wells treated with Longidaza® ( $p < 0.05$ ). The text continues here (Figure 2 and Table 2).

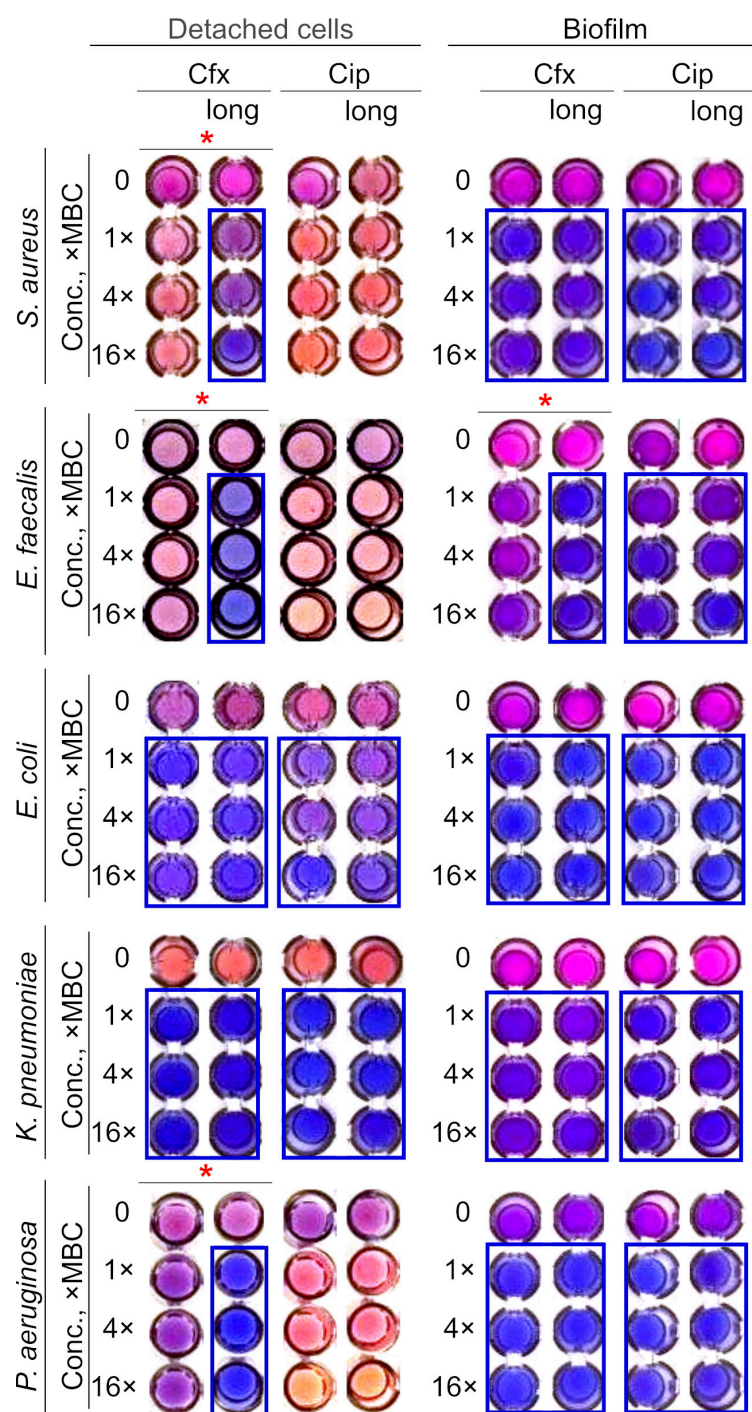

**Figure S2.** The effect of Longidaza® on the susceptibility of biofilms-embedded bacteria to antimicrobials. Longidaza® was added to 48 h old biofilms until final concentration of 750 IU/mL. Ciprofloxacin and cefuroxime were added up to final concentrations of 1-16× MBC (see Table S1 for values). After 24 h incubation, the biofilms were washed twice with sterile 0.9% NaCl. The viability of adherent cells was analyzed with resazurine test. Blue boxes denote wells with non-viable cells. \* shows where there was a difference between treated and untreated wells.

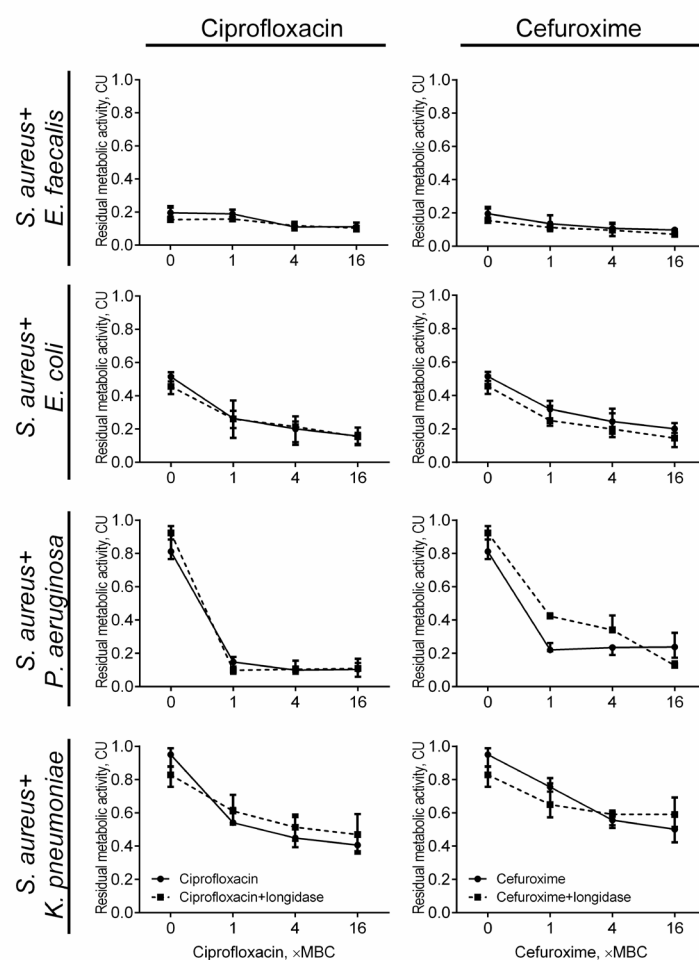

**Figure S3.** The effect of Longidaza® on the susceptibility of biofilms-embedded dual species bacterial consortia to antimicrobials. Longidaza® was added to 48 h old biofilms until final concentration of 750 IU/mL. Ciprofloxacin and cefuroxime were added up to final concentrations of 1–16×MBC (see Table S1 for values). After 24 h incubation, biofilms were washed twice with sterile 0.9% NaCl and the viability of adherent cells was analyzed with MTT assay.

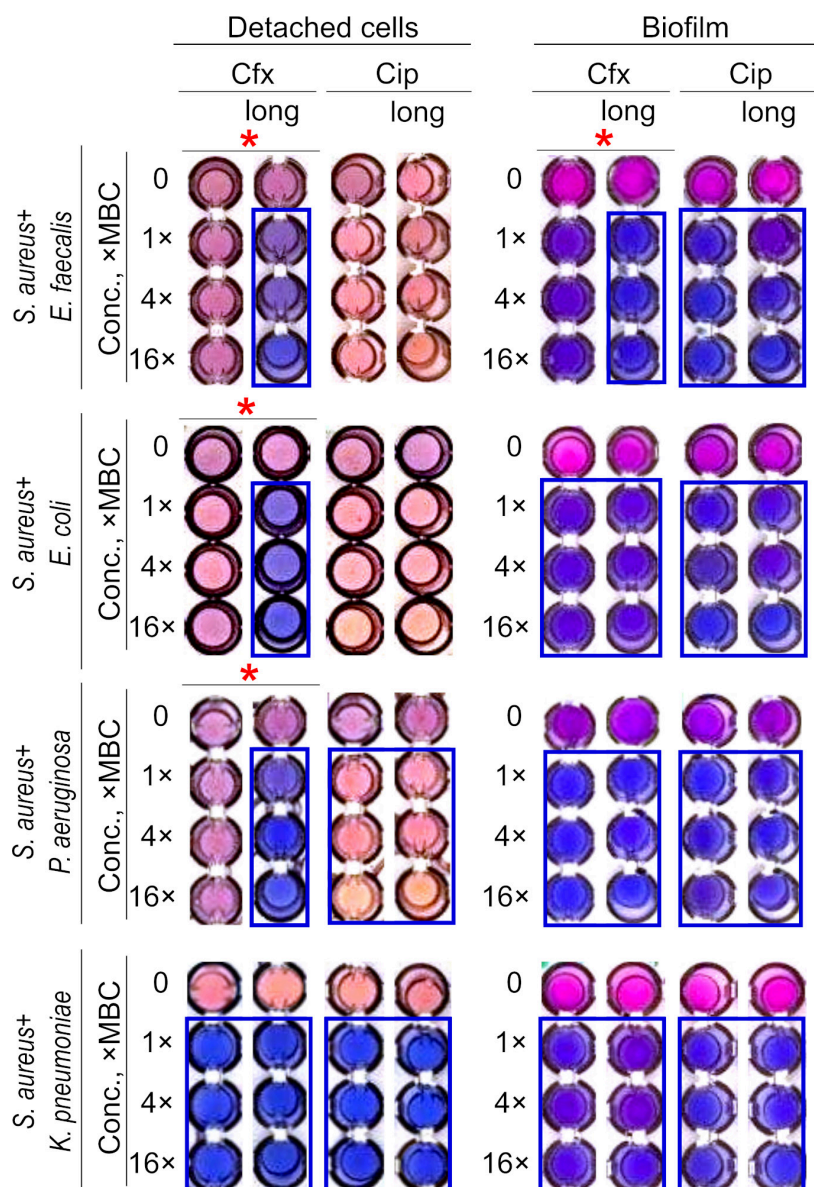

**Figure S4.** The effect of Longidaza® on the susceptibility of biofilms-embedded dual species bacterial consortia to antimicrobials. Longidaza® was added to 48 h old biofilms until final concentration of 750 IU/mL. Ciprofloxacin and cefuroxime were added up to final concentrations of 1-16xMBC (see Table S1 for values). After 24 h incubation, biofilms were washed twice with sterile 0.9% NaCl and the viability of adherent cells was analyzed with resazurine test. Blue boxes denote wells with non-viable cells. \* shows where there was a difference between treated and untreated wells.
